1 **Title:** Restored somatosensation in individuals with lower limb loss improves gait, speed  
2 perception, and motor adaptation

3  
4 **Authors:**

5 Daekyoo Kim,<sup>1,2,3</sup> Ronald Triolo,<sup>1,2</sup> Hamid Charkhkar<sup>1,2\*</sup>

6  
7 **Affiliations:**

8 <sup>1</sup>Department of Biomedical Engineering, Case Western Reserve University, 10900 Euclid  
9 Avenue, Cleveland, OH 44106, USA

10 <sup>2</sup>Louis Stokes Cleveland Veterans Affairs Medical Center, 10701 East Boulevard,  
11 Cleveland, OH, 44106, USA

12 <sup>3</sup>Department of Physical Education, Korea University, Seoul 02841, Korea

13  
14 \*Corresponding author: Hamid Charkhkar

15  
16 Address: Louis Stokes Cleveland Veteran Affairs Medical Center, 10701 East Blvd  
17 (Room B-E242), Cleveland, OH 44106, USA

18 Email: [hamid.charkhkar@case.edu](mailto:hamid.charkhkar@case.edu);

19 Tel: +1 216-791-3800 ext. 62924

20 Fax: +1 216-707-6420

21 ORCID: <https://orcid.org/0000-0001-5485-5969>

22  
23 **Abstract:** Lower limb loss is a significant insult to the body's nervous and musculoskeletal  
24 systems. Despite technological advances in prosthesis design, artificial limbs are not yet  
25 integrated into the body's physiological systems. Therefore, lower limb amputees (LLAs)  
26 experience lower balance confidence, higher fear of falls, and impaired gait mechanics compared  
27 to their able-bodied peers (ABs). Restoring sensations perceived as originating directly from the  
28 missing limb via implanted neural interfaces were shown to improve balance and performance in  
29 certain ambulatory tasks; however, the effects of such evoked sensations on neural circuitries  
30 involved in the locomotor activity are not well understood. In this work, we investigated the  
31 effects of plantar sensation elicited by peripheral nerve stimulation delivered by multi-contact  
32 nerve cuff electrodes on gait symmetry and stability, speed perception, and motor adaptation  
33 during walking. We found that restored plantar sensation increased stance time and propulsive  
34 force on the prosthetic side, improved gait symmetry, and yielded an enhanced perception of  
35 prosthetic limb movement. Most importantly, our results show the locomotor adaptation among  
36 LLAs with plantar sensation became similar to ABs. These findings suggest that our peripheral  
37 nerve-based approach to elicit plantar sensation directly affects central nervous pathways  
38 involved in locomotion and motor adaptation during walking. Our neuroprosthesis provided a  
39 unique model to investigate the role of somatosensation in the lower limb during walking and its  
40 effects on perceptual recalibration following a locomotor adaptation task. Furthermore, we  
41 demonstrated how plantar sensation in LLAs could effectively increase mobility, improve  
42 walking dynamics, and possibly reduce fall risks.

43  
44 **One-Sentence Summary: Neuroprosthesis stabilizes gait and improves speed perception and**  
45 **locomotor adaptation in individuals with lower limb loss.**

46  
47  
48  
49 **Main Text:**

50 **INTRODUCTION**

NOTE: This preprint reports new research that has not been certified by peer review and should not be used to guide clinical practice.

1 Despite advances in prosthetic technology, current lower limb prostheses do not provide  
2 direct sensory feedback to the user. Consequently, individuals with lower limb loss need  
3 to rely solely on interpreting the pressures between their prosthetic sockets and residual  
4 limbs to learn indirectly about the interactions of their prostheses with the ground. This  
5 compromised sensory feedback partially plays a role in increased fall risks (1), loss of  
6 confidence in the prosthesis (2), and excessive reliance on the intact limb (3).  
7 Asymmetrical walking, as often reported in lower limb amputees (LLAs) (4), increases  
8 fatigue (5) and reduces postural stability during walking (6). In addition, because the  
9 direct sensory link between the foot and the brain is missing and the perception of  
10 prosthesis-ground interactions is indirect, LLAs also have difficulties in adapting to  
11 changes in walking environments (7–9).

12  
13 Plantar sensation and joint proprioception play a crucial role in continuously interacting  
14 with our surrounding environment while ambulatory (10–12), and provide information  
15 about changing surface characteristics to the central nervous system (CNS) aids in  
16 adapting to predictable perturbations such as walking on slippery surfaces or negotiating  
17 stairs. Input from plantar cutaneous afferents is integrated at different CNS nuclei during  
18 walking (13), contributing to an accurate representation of the spatial and temporal  
19 movements of the limb (14). Through the somatosensory feedback from lower limbs, we  
20 recalibrate limb speed perception and update the predictive internal model for controlling  
21 limb movement with our expected perceptual consequences.

22  
23 For LLAs, the sensorimotor feedback loop is severely disrupted due to limb loss. Recent  
24 reports have demonstrated the feasibility of neural interface technology in restoring  
25 sensation perceived as originating from and co-located with the missing limb (7, 15, 16).  
26 Sensations elicited by peripheral nerve stimulation in LLAs have exhibited modalities  
27 such as pressure, vibration, and perception of joint movement (15–17) referred to discrete  
28 locations on the missing limb. These reports also indicate improvements in balance (18),  
29 ambulatory performance (13), prosthesis weight perception (19), and phantom pain (20)  
30 with appropriately modulated peripheral nerve stimulation. Despite such reports, it is not  
31 yet clear how elicited somatosensation from the missing foot affects motor function in the  
32 lower limb during ambulation. Furthermore, the effects of such elicited sensation on limb  
33 movement perception and the consequent impact on motor adaptation are largely  
34 unknown. Locomotion is inherently a sensorimotor task, and any elicited sensations from  
35 the lower limb are only effective if integrated into the motor circuitry.

36  
37 The tactile sensation elicited by peripheral nerve stimulation suggests that areas associated  
38 with anatomical representations of the missing limb are activated in the primary  
39 sensorimotor cortex (S1) (21). While multiple groups have investigated the neural  
40 pathways involved in the tactile sensation of hand, there has been less focus on  
41 determining the relationship between afferent inputs from the lower limb and higher  
42 neural circuitries, such as the spinal cord, cerebellum, and somatosensory cortex. Evidence  
43 from animal studies shows that the S1 processes afferent information from the foot and  
44 responds rapidly after the onset of perturbations suggesting a causal link between S1 area  
45 activation and motor adaptation and learning (22–25). Hence, somatosensation elicited via  
46 peripheral neural stimulation may activate the same brain circuitries in LLAs and possibly  
47 drive motor adaptation and learning directly in a manner similar to individuals without  
48 limb loss.  
49

1 In this work, we hypothesize that plantar sensation directly affects CNS pathways  
2 involved in limb movement perception, the ability to perceive changes in limb  
3 movements, and motor adaptation during walking. Our study presents a number of  
4 important observations. Firstly, we demonstrate that a sensory neuroprosthesis (SNP)  
5 improves the perception of limb movement. The SNP provides the user with elicited  
6 plantar sensations corresponding in location and intensity to applied loads to the prosthetic  
7 foot (Fig. 1). Secondly, we show that the changes in limb movement perception due to the  
8 SNP improves the biomechanics of walking. Finally, we show that the SNP enables LLAs  
9 to adapt to changing gait conditions imposed by the split-belt treadmill paradigm in a  
10 manner similar to able-bodied individuals (ABs). Our findings provide new evidence on  
11 how somatosensation contributes to locomotion and motor adaptation while walking.  
12 These results demonstrate how a neurally-integrated lower limb prosthesis can lead to  
13 increased mobility, improved walking dynamics, and possibly a reduction of fall risks  
14 among LLAs.

## 15 RESULTS

### 16 *Restoring Somatosensation Improves Gait Symmetry and Stability*

17 The artificially elicited sensation from the prosthetic limb was integrated into the intact  
18 neuromuscular control system, leading to immediate changes in gait. SNP users perceived  
19 sensations that matched in location and intensity of the plantar pressure under the  
20 prosthetic foot during walking, allowing them to easily perceive that the sensation was  
21 coming from the interaction of the prosthetic foot with the ground. To quantify the extent  
22 to which SNP improves walking, participants initially walked on a split-belt treadmill with  
23 belts moving at the same speed (Fig. 1A). As described in the Methods section, LLA  
24 participants performed this task with SNP in the active or inactive mode in a randomized  
25 order. We found the SNP active condition resulted in improvements in spatiotemporal gait  
26 symmetry during steady-state walking (Fig. 2). The prosthetic limb's step length (SL)  
27 increased by an average of 7.55% for the SNP active versus the inactive condition (Fig.  
28 2A,  $P < 0.01$ ). Average increases in SL for each participant were 7.85%, 7.40%, and 7.45%  
29 for LLA01, LLA02, and LLA03, respectively (Fig. S1A, B, & C). Similarly, the intact  
30 limb's SL increased by an average of 15.87% for the SNP active condition (Fig. 2A,  
31  $P < 0.01$ ). Average increases in intact limb SL for each participant were 16.20%, 14.38%,  
32 and 16.89% for LLA01, LLA02, and LLA03, respectively (Fig. S1A, B, & C). Notably,  
33 the SL symmetry changed from 105.90% to 98.34%, an average decrease of 7.13% (Fig.  
34 2A,  $P < 0.01$ ): LLA01: 103.51% to 96.07% (7.18%), LLA02: 104.80% to 98.40% (6.11%),  
35 and LLA03: 109.38% to 100.56% (8.07%) (Fig. S1A, B, & C). For comparison, ABs  
36 showed an SL symmetry of 100.35% during the same task (Fig. 2A). Consistent with  
37 changes in SL, the prosthetic limb's stance time (ST) increased by an average of 7.92%  
38 for the SNP active condition (Fig. 2B,  $P < 0.01$ ). The average increases in ST were 7.69%,  
39 9.38%, and 6.89% for LLA01, LLA02, and LLA03, respectively (Fig. S2A, B, & C). The  
40 intact limb's ST increased by an average of 8.28% for the SNP active condition (Fig. 2B,  
41  $P < 0.01$ ): increases of 7.71%, 7.88%, and 9.25% for LLA01, LLA02, and LLA03,  
42 respectively (Fig. S2A, B, & C). Subsequently, the changes resulted in improvements in  
43 ST symmetry by an average of 8.95% (Fig. 2B,  $P < 0.01$ ) (LLA01: 9.27%, LLA02:  
44 10.65%, & LLA03: 6.99%; Fig. S2A, B, & C). For comparison, ABs showed an ST  
45 symmetry of 100.06% (Fig. 2B).

46  
47  
48 We also found that the SNP increased ground reaction forces (GRFs) on the prosthetic  
49 limb. The peak propulsive force on the prosthetic limb increased by an average of 45.01%  
50 in the SNP active condition (Fig. 3A,  $P < 0.01$ ): increases of 27.74%, 51.79%, and 56.39%

1 for LLA01, LLA02, and LLA03, respectively (Fig. S3B, E, & H), improving propulsive  
2 force symmetry by an average 48.96% (Fig. 3A,  $P<0.01$ ) (LLA01: 19.25%, LLA02:  
3 65.93%, & LLA03: 59.39%; Fig. S3B, E, & H). The peak braking force and symmetry  
4 remained unchanged for both SNP active and inactive conditions. In addition, the peak  
5 mediolateral force and symmetry remained unchanged for both SNP active and inactive  
6 conditions (Fig. S4A, B, & C) due to the simultaneous increases in mediolateral forces in  
7 both limbs. The peak vertical force remained constant in prosthetic and intact limbs  
8 regardless of the SNP condition (Fig. S4D, E, & F). However, the vertical force impulse  
9 on the prosthetic limb significantly increased by 6.99% due to increased stance duration  
10 on the prosthetic limb, thus improving the symmetry of the vertical force impulse between  
11 the prosthetic and intact limb by 6.22% (Fig. S4F).

12  
13 The whole-body angular momentum (WBAM) stabilized over the gait cycle in the SNP  
14 active condition. The range of sagittal-plane WBAM in the second half of the gait cycle  
15 (i.e., the intact stance phase) increased by an average of 25.34% in the SNP active  
16 condition (Fig. 3B,  $P<0.01$ ) (LLA01: 53.52%, LLA02: 12.99%, & LLA03: 7.63%; Fig.  
17 S5A, C, & E). In addition, the range of frontal-plane WBAM was reduced by an average  
18 of 13.25% in the SNP active condition (Fig. 3C,  $P<0.01$ ) (LLA01: 22.44%, LLA02:  
19 10.40%, & LLA03: 1.59%; Fig. S3B, D, & F). The mediolateral center of pressure (M-L  
20 COP) was reduced by an average of 6.40% in the SNP active condition (Fig. 3D,  $P<0.01$ )  
21 (LE01: 10.23%, LE02: 10.35%, & LE04: 2.36%; Fig. S6A, B, & C). Despite changes in  
22 spatiotemporal gait measures, there were no changes in the ankle, knee, and hip joint  
23 angles for prosthetic and intact limbs during the stance phase of walking in LLAs,  
24 regardless of SNP condition (Fig. S7A-F).

### 25 26 ***Enhanced Gait Speed Perception***

27 To assess changes in limb speed perception, we designed a symmetry judgment task (SJT)  
28 (Fig. 4A). Consistent with standard psychophysical tests in sensory neuroscience, the SJT  
29 is a binary test to quantify the percentage of correct responses with and without SNP  
30 active. Participants performed the SJT to investigate whether SNP enhanced limb speed  
31 perception during walking, and to show how perceptual results were corroborated with  
32 actual biomechanical changes during walking. This highlights the suitability of SJT as a  
33 new task to investigate the relationship between the perceived and actual movement speed  
34 during ambulation. The belt speed on the intact side was kept constant, whereas it was  
35 changed on the prosthetic side in randomized order within the trial (See Methods section  
36 for more details). Verbal responses from the participants on whether the belts were at the  
37 same speed determined the “perceived speed,” while the center of mass velocity (COMV)  
38 was used to examine the actual speed symmetry between limbs (Fig. 4D). We found that  
39 LLAs with the SNP could more accurately match the speed of their prosthetic limb to that  
40 of the intact limb, indicating improved perceived speed (Fig. 4B). During the SJT, the  
41 perceived symmetry improved by, on average, 40.28% (Fig. 4C,  $P<0.01$ ) in SNP active  
42 condition (LLA01: 50.01%, LLA02: 29.17%, and LLA03: 37.50%; Fig. S8A, D, & G).  
43 The LLAs with the SNP active also showed an improvement in the COMV symmetry by  
44 an average of 6.76% (Fig. 4E & F,  $P<0.01$ ) (LLA01: 7.13%, LLA02: 7.34%, & LLA03:  
45 5.15%; Fig. S9A, D, & G). The COMV symmetry measure supports the perceived  
46 symmetry results. Additionally, the time delay to verbal response was reduced by an  
47 average of 19.51% (Fig. 6A,  $P<0.01$ ) when SNP was active (LLA01: 17.84%, LLA02:  
48 24.05%, & LLA03: 28.42%; Fig. S10A, D, & G). The above results strongly suggest that  
49 our peripheral nerve-based approach to eliciting plantar sensation directly and positively  
50 affects central nervous pathways involved in gait symmetry and perception.

## Effects of SNP on Locomotor Adaptation

In some situations, it has been shown that sensory feedback improves motor adaptation by repeating the same movement pattern, that is, the result of reinforcement learning. Here we confirmed whether LLAs with restored plantar sensation experienced perceptual changes similar to ABs in the context of split-belt adaptation. To determine the effect of the SNP on perceptual recalibration after split-belt walking, participants performed a motor adaptation task (MAT), where the prosthetic-side belt was driven to move at twice the speed of the intact-side belt. The SJT was performed pre- and post-MAT to characterize the effects of motor adaptation on perceptual recalibration of walking speed (Fig. 5A). In the early MAT, the COMV symmetry was not statistically different between SNP active and inactive conditions (Fig. 5B & C), indicating that somatosensory feedback did not affect the initial adaptation in the task. Although LLAs appeared to adapt their limb speed to the fast belt as the MAT continued, the extent LLAs adapted over time depended on the SNP condition, with slower adaptation for SNP inactive condition. In the late MAT, the COMV symmetry improved for SNP active by 10.55% on average (Fig. 5B & C,  $P < 0.01$ ) (LLA01: 17.76%, LLA02: 6.06%, & LLA03: 8.23%, Fig. S9B, E, and H), indicating that sensory feedback increased the amount of adaptation to the fast belt. Interestingly, LLAs with SNP showed a similar adaptation to ABs in their walking during the MAT, suggesting the plantar sensation's role in normalizing the motor adaptation in LLAs (Fig. 5B & C). The findings from the MAT provide preliminary evidence that plantar sensation has a direct role in locomotor learning, and our peripheral nerve-based technique in human amputees enabled us to probe this relationship in a systematic way.

To examine the effects of MAT on motor and perceptual recalibration, we performed another SJT following the MAT, i.e., SJT<sub>post</sub>. In the early SJT<sub>post</sub>, the COMV symmetry was decreased by an average of 6.98% in SNP active condition (Fig. 5D,  $P < 0.01$ ) (LLA01: 7.59%, LLA02: 6.18%, & LLA03: 6.98%, Fig. S9C, F, & I), while remaining unchanged in SNP inactive condition. In the late SJT<sub>post</sub>, although the difference in COMV symmetry in SNP active and inactive conditions became as small as 3.03%, they still remained significant (Fig. 5D,  $P < 0.01$ ). The COMV symmetry results confirm, support, and coincide with the subjective perceived symmetry measures. We also observed that LLAs with the SNP had similar perceptual recalibration to ABs in the early but not in the late SJT<sub>post</sub> (Fig. 5E). Furthermore, LLAs with SNP demonstrated a robust adaptation (represented by a biased Gaussian curve in Fig. 5E) in the perception of their prosthetic versus intact limb speed. In the early SJT<sub>post</sub>, LLAs with SNP showed a significant adaptation aftereffect, resulting in a 65.74% decrease in perceived symmetry compared to the same group and condition pre-MAT (Fig. 5F,  $P < 0.01$ ): decreases of 71.87%, 56.95%, and 66.67% for LLA01, LLA02, and LLA03, respectively (Fig. S8B, E, & H), suggesting that the perception of limb speed was recalibrated such that the prosthetic limb (the limb that moved faster during MAT) felt slower after adaptation. On the other hand, the limb speed following MAT remained unaffected for SNP inactive condition (Fig. 5E & F), indicating no perceptual recalibration. Similar to the results observed from the SJT<sub>pre</sub>, the time delay to response in the early SJT<sub>post</sub> was reduced by an average of 21.18% (Fig. 6B,  $P < 0.01$ ) in the SNP active condition (LLA01: 26.24%, LLA02: 13.38%, & LLA03: 23.32%, Fig. S10B, E, & H).

## DISCUSSION

Somatosensation in the lower limb plays a crucial role in gait stability, symmetry, and control as it constantly informs motor planning and coordination. Our work shows that

1        plantar sensation could have a meaningful functional impact among transtibial amputees,  
2        who constitute the majority of the LLA population (26). It is reasonable to assume that  
3        similar or greater functional improvements could be achieved by SNP recipients with  
4        transfemoral amputation due to their higher gait stability needs. Furthermore, recent  
5        research indicates that the number of transtibial amputations among US veterans is  
6        increasing, while the number of transfemoral amputations is decreasing (27). These  
7        findings suggest that despite the higher functional deficits experienced by transfemoral  
8        amputees, the growing demand for assistive technology for LLA is likely to come from  
9        the transtibial amputee population. Therefore, it is crucial to assess the effects of any new  
10        prosthetic technology on transtibial amputees to ensure the needs of prosthesis users  
11        within this population are met. Recent reports show how direct sensory feedback could  
12        improve temporal elements of gait (such as walking speed) for transfemoral amputees.  
13        Our study builds on such reports and provides a comprehensive analysis of the impact of  
14        elicited plantar sensation on spatiotemporal symmetry and whole-body dynamic balance,  
15        which are important and clinically relevant outcome measures of overall stability and  
16        movement dynamics that have not yet been studied. Above all, this study is unique and  
17        original in that it examines the effects of somatosensation on locomotor adaptation in  
18        LLAs which were not previously explored in *either* transtibial or transfemoral amputees.  
19        This is of particular interest because reduced or compromised somatosensation occurs as  
20        from of a variety of conditions, including highly prevalent peripheral neuropathy and  
21        dysvascular diseases such as diabetes that commonly result in transtibial amputation. Our  
22        results also provide insight into how plantar sensory feedback could improve motor  
23        learning, which could lead to new applications of neural interface technology for  
24        locomotor training-based rehabilitation that can maximize stability and safety in amputees  
25        and others with gait impairments resulting from sensorimotor impairment.

26  
27        We demonstrated the effect of a lower limb SNP on the gait performance of unilateral  
28        transtibial amputees by developing a new walking speed perception task based on a split-  
29        belt walking adaptation paradigm (28) combined with psychophysical methods (29–31).  
30        The experimental methodology was adapted from previously established motor adaptation  
31        paradigms utilized to assess ambulatory function in individuals with hemiplegia. This  
32        paradigm provides an experimental framework to understand how perceiving the  
33        interactions of the prosthesis with the environment during walking would affect motor  
34        learning and indicates how well the prosthesis is integrated into the body schema. It is  
35        directly related to real-world functional gait as we often change our speed during  
36        ambulation, and any mismatch between actual and perceived movement could increase the  
37        risk of falling. This paradigm is specifically relevant to maintaining gait stability during  
38        changing environmental conditions and exploring the robustness of the sensorimotor  
39        apparatus for safe and effective ambulation. Our results suggest that the plantar  
40        somatosensory feedback elicited via the SNP improved gait symmetry and stability,  
41        recalibrated the motor and perceptual response during walking, and updated the memory  
42        of the motor and perceptual recalibration after learning a new walking pattern. These  
43        findings indicate that the SNP directly affects locomotor neural circuitry in the CNS and  
44        reduces the discrepancy between the perceived and actual symmetry during walking.

45  
46        We observed that the SNP reduced gait asymmetry by improving SL, ST, and GRFs. With  
47        the SNP active, the prosthetic foot pushed the ground stronger over a longer period,  
48        increasing the prosthetic foot's forward propulsive force and ST, respectively. These  
49        observations suggest the elicited plantar sensations could partially compensate for the lack  
50        of prosthetic plantarflexion and increase the prosthetic ST to reduce the asymmetry

1 between limbs. Longer ST on the prosthetic side led to an increase in the intact limb's SL,  
2 thereby improving the symmetry between the prosthetic and intact SL. The increased  
3 propulsive force also indicates that plantar somatosensory feedback enhances the  
4 regulation of the prosthetic foot sole rolling over the treadmill belt, boosting the walking  
5 confidence of LLAs with the SNP. Elicited plantar sensations increased the forward  
6 propulsive force, but no change in vertical force was observed, as reported previously (6,  
7 13). This suggests that recipients of the SNP used the new sensory input to improve their  
8 gait mechanics to achieve a more regular gait pattern instead of developing a new,  
9 abnormal gait paradigm. Finally, the increased prosthetic forward propulsion increases  
10 work output from the prosthetic ankle during push-off (32–34), potentially reducing the  
11 metabolic energy penalty for gait in LLAs (35).

12  
13 In addition to spatiotemporal gait improvements, the whole-body rotational dynamics  
14 changed with the application of the SNP. This is significant because it demonstrates the  
15 role of somatosensory feedback in maintaining dynamic stability to reduce fall risks and  
16 fall-related injuries in this population (17). If not appropriately compensated, we found  
17 that the reduced prosthetic propulsion leads to alterations in whole-body movement  
18 patterns. This observation is consistent with reports following the use of powered ankle-  
19 foot prosthesis (36), indicating somatosensation from the missing limb could provide  
20 higher propulsion and gait stability without the need for sophisticated, heavy, or expensive  
21 wearable robotic prostheses. Our results show that the SNP considerably increased  
22 prosthetic-side propulsion, intact limb SL, and, consequently, the range of sagittal-plane  
23 angular momentum in the second half of steps made with the prosthesis. These  
24 observations suggest that restored somatosensation on the prosthetic side compensates for  
25 the reduced propulsion in the step-to-step transition, contributes to symmetry in the inter-  
26 limb coordination during walking, and promotes forward and backward rotational  
27 stability. Although elicited sensations seem to affect sagittal-plane angular momentum, the  
28 mechanism for this change in whole-body rotation needs to be studied further. Recording  
29 hip and trunk muscle activity could help determine whether elicited sensations from the  
30 missing foot change any muscle activation patterns at proximal anatomical locations while  
31 walking and elucidate the mechanisms by which sagittal angular momentum is affected by  
32 the somatosensory inputs provided by the SNP.

33  
34 Based on our results, the role of somatosensation is more dominant in maintaining  
35 mediolateral versus anterior-posterior gait stability. The level of awareness of prosthesis  
36 interactions with the environment was increased by the SNP, further highlighting the  
37 importance of adequate somatosensory contribution to adjusting the mediolateral COM  
38 position with the lateral border of the base of support (BOS). The SNP reduced the  
39 mediolateral distance between COP and COM (i.e., the distance between the vertical  
40 projection of the COM position and the lateral border of the BOS, see Fig. 3D) of LLAs  
41 over the gait cycle, bringing them to similar levels observed in ABs. This may be due to  
42 the SNP allowing LLAs to better control their BOS by adjusting the mediolateral COM  
43 state with appropriate strategies to reduce the mediolateral moment arm (i.e., position  
44 vector from COM to COP) in combination with higher forward propulsive force. The  
45 reduction in mediolateral COP-COM distance is the dominant mechanism for maintaining  
46 gait stability in the frontal plane (37), contributing to the decrease in the range of whole-  
47 body angular momentum (38, 39). Previous studies have shown that inadequate regulation  
48 of frontal plane angular momentum is indicative of poor balance control (40) and poor  
49 ability to adapt to perturbations (41), particularly in populations with a high risk of falls  
50 (42). Notably, transtibial amputees have difficulty regulating their angular momentum due

1 to the functional loss of the ankle muscles (43), which may explain their increased risk  
2 and fear of falling compared to ABs (44). The restored plantar sensation significantly  
3 reduced the range of frontal-plane angular momentum, providing valuable insight into the  
4 biomechanical mechanisms that may detect and control the risks of falls in LLAs.

5  
6 The improvement in limb speed perception with the SNP reveals an interconnect between  
7 proprioception and somatosensation. The symmetry judgment task (SJT) during  
8 ambulation allowed us to examine whether changes in the gait symmetry due to elicited  
9 planar sensations would affect the perception of walking symmetry between limbs.  
10 Without sensory feedback, participants relied on limited haptic information from residual  
11 limb-socket interactions, which were not sufficient to accurately perceive the limb  
12 movement during walking, as evidenced by poor perceived symmetry results during the  
13 SJT. However, with the SNP, our participants felt the change in the forward COMV in  
14 mid-stance with the prosthetic limb during walking. Hence, they were more aware of the  
15 speed differences between prosthetic and intact limbs. The improvement in the limb  
16 movement speed perception was possibly achieved with plantar sensation cues from the  
17 foot-floor interactions. Although the sensory perceptions elicited by the SNP were not  
18 directly related to proprioception, these results suggest that modulation of forward COMV  
19 due to the SNP provided the users with the feedback necessary to detect the timing of  
20 plantar sensations corresponding to the magnitude and location of prosthesis-floor  
21 interactions, from which they may have been able to infer proprioceptive-like information  
22 related to the ankle. In other terms, the elicited plantar sensations may have affected limb  
23 movement perception in an indirect way. During the SJT, the somatosensory feedback  
24 provided by the SNP enabled users to detect the changes in the belt speed and adjust their  
25 forward COMV accordingly. Thus, the SNP allowed LLAs to considerably reduce the  
26 discrepancy between the perceived and actual belt speeds and reliably discriminate subtle  
27 belt speed differences.

28  
29 Our results from participants with transtibial limb loss show a lower forward COMV at  
30 mid-stance for the intact side compared to the prosthetic side, consistent with previous  
31 reports for both transtibial (4) and transfemoral (45) amputees. The improvement in the  
32 COMV with the SNP could be attributed to a lighter perception of prosthetic weight (19),  
33 improved stability (13, 18), and higher confidence in the prosthesis (7). On the other hand,  
34 asymmetry of the forward COMV has been shown even when the prosthetic and intact  
35 limbs moved with identical kinematics (46). Our results confirmed that plantar  
36 somatosensory feedback improves the symmetry of the forward COMV between  
37 prosthetic and intact limbs. With the SNP, the prosthetic ST increased, decreasing the  
38 forward COMV on the prosthetic side, which led to reducing COMV asymmetry.

39  
40 We also investigated whether LLAs learned and retained a new walking pattern after a 10-  
41 min split-belt walking motor adaptation task (i.e., MAT). Without the SNP, the  
42 recalibration of limb speed perception was significantly reduced in the  $SJT_{post}$ . This  
43 recalibration is an established perceptual aftereffect, such that the limb that moved faster  
44 during the MAT would feel as if it moved slower post-MAT (47). In addition, the SNP  
45 helped users reach a perceptual recalibration similar to ABs. The perceptual recalibration  
46 effects are also supported by changes in the forward COMV symmetry measures,  
47 suggesting that the speed perception was affected by COMV changes during walking.

48  
49 Our results demonstrate that plantar somatosensory feedback provides direct input to brain  
50 circuitries involved in perceptual recalibration during walking. Although sensorimotor



1 learning is coordinated by the cerebellum (48, 49), none of our LLAs had any reported  
2 cerebellar dysfunction. Prior work suggests that perceptual recalibration can occur even in  
3 patients with cerebellar deficit suggesting other brain areas, such as the posterior parietal  
4 cortex, might be involved in predicting sensory consequences of movement (50). Without  
5 somatosensory feedback, our participants with lower limb loss were able to adapt their  
6 limb movements to the treadmill's belt speed but could not update their perceived  
7 movement speeds. This suggests that in addition to pathways involved in motor  
8 adaptation, other areas in the brain, besides the cerebellum, might be involved in the  
9 perception calibration during walking in LLAs. The somatosensory feedback is received  
10 and processed in the somatosensory cortex (51, 52) and subsequently affects cortical  
11 motor control centers (such as the motor cortex) to revive the representation of the limb  
12 movement (20, 53). Proprioceptive and somatosensory prediction errors then update the  
13 internal model, which consequently drives motor adaptation (54, 55). Recently, Mathis et  
14 al. (2017) showed that the primary somatosensory cortex (S1) plays an essential role in  
15 motor adaptation in mice, which updates subsequent motor commands needed to reduce  
16 motor errors (22). We found that LLAs without the SNP were similar to ABs in early  
17 adaptation (Fig. 5C Early) but different in motor (Fig. 5D Early) and perceptual (Fig. 5F  
18 Early) recalibration. This suggests that cutaneous input from the residual limb still played  
19 a role in motor adaptation; however, it was not enough to update the working memory of  
20 limb movement. Although lines of evidence, as seen in the human model, demonstrated  
21 the benefit of the SNP while walking on a treadmill (56), over the ground (17), and  
22 horizontal ladder (13), this is the first report to examine the effects of elicited plantar  
23 sensation on motor adaptation. In this work, we were primarily concerned about whether  
24 motor adaptation was affected by amputation and could be normalized by the SNP.  
25 However, to understand the underlying mechanisms, in-depth motor-behavioral and  
26 imaging studies such as EEG recordings could help elucidate the relationship between  
27 SNP, activation of the sensory cortex, and its effects on motor adaptation.  
28

29 Our work denotes several important functional implications of the SNP for LLAs,  
30 including achieving higher gait symmetry and stability, as well as the integration of the  
31 prosthesis with the neural circuitry responsible for locomotor adaptation. Although the  
32 emphasis during post-amputation rehabilitation is generally on achieving symmetric step  
33 length, partly because it is one of the most observable gait characteristics, attempts to  
34 achieve such symmetry may lead to other undesirable functional outcomes (57, 58). The  
35 spatial measures such as step length asymmetry are highly variable, but subject-dependent,  
36 after lower limb loss. Therefore, a more robust measure to examine gait asymmetries is  
37 preferred. We argue that differences in COMV trajectories between prosthetic and intact  
38 legs may more accurately capture asymmetries in both magnitude and timing of loading  
39 between legs on a step-to-step basis. Most importantly, our results suggest that the COMV  
40 during the stance phase on the prosthetic limb is directly affected by the restored plantar  
41 sensation. Therefore, the symmetry of the forward COMV appears to reflect the actual  
42 kinematic behaviors exhibited by the lower limbs. Therefore, the sagittal COMV may be  
43 capable of detecting the timing of prosthetic loading during walking with a single, global  
44 variable that is also related to gait stability.  
45

46 Although interfacing with the peripheral nerves following lower limb amputation has  
47 shown promising results in restoring somatosensation from the lower limb, our approach  
48 is uniquely different than the others. A detailed comparison of elicited sensations among  
49 different peripheral neural interfaces has been recently published (59). Our perineural  
50 technology does not penetrate the nerve and, therefore, is particularly suitable for long-

1 term use and applications outside of the laboratory. LLA01 received the surgically  
2 implanted SNP seven years prior to the time of this report, with consistent operation and  
3 stable sensory responses throughout. The data collection for this study lasted for  
4 approximately five months, during which time participants routinely visited our laboratory  
5 for other experiments following their implant surgery (13, 15, 18, 60, 61). Throughout this  
6 and other previously reported studies, the implanted C-FINEs have demonstrated stable  
7 and reliable performance as evidenced by eliciting sensations in consistent locations  
8 related to the plantar surface of the foot of the missing limb. Furthermore, similar  
9 technology has been used in individuals with upper limb loss and spinal cord injury with  
10 no reported nerve damage or loss of response for over a decade (62, 63), supporting the  
11 long-term stability and chronic viability of this neural interface. Moreover, our selective  
12 multi-contact nerve cuffs can significantly improve function with broader and less focused  
13 percept locations than reported in the previous studies (7). We argue that smaller  
14 perceptual areas on the plantar surface of the foot might not be as crucial in improving gait  
15 mechanics as those on the palmar surface of the hand in enhancing grasp function. During  
16 gait, the sensory input from the plantar foot that contributes to the loading profile is  
17 primarily reliant on pressure sensing at a few broad regions, such as the toes, metatarsal  
18 areas, midfoot, and heel. Our technology can reliably and continuously elicit such  
19 sensations. Additionally, there is a similarity in reported modalities and intensities of  
20 sensations between our approach and the intraneural method. Both approaches reported  
21 qualities such as touch, pressure, and tingling that can be modulated over a useful dynamic  
22 range in response to input from physical sensors (15, 17, 59). Most importantly, our  
23 findings on improvements in gait biomechanics have not been reported before. In this  
24 study, we report on improvements in gait symmetry and stability, and motor adaptation  
25 during walking. In contrast, the previously published work reported increased gait speed  
26 and improved gait efficiency (i.e., reduced metabolic cost).

27  
28 We acknowledge that our study had certain limitations. Only three LLAs who received  
29 our implantable SNP participated in the current study. Therefore, data from a larger  
30 population, including participants with transtibial and transfemoral amputations, must be  
31 collected before generalizing the reported positive effects of restoring sensory feedback to  
32 LLAs. Because we used a new task paradigm, results need to be verified in a larger group  
33 of people with a more diverse demographic of age and sex with difficulty in walking due  
34 to various amputation etiologies.

## 35 36 **MATERIALS AND METHODS**

### 37 *Research participants*

38 Six able-bodied volunteers (AB01-AB06), three women and three men, served as a control  
39 group. On average, participants were  $23 \pm 3$  years old (mean  $\pm$  standard deviation) and  
40  $1.76 \pm 0.07$  m tall (See Supplemental Table S1 for more detailed demographics). Three  
41 volunteers with unilateral below-knee (transtibial) limb loss were also enrolled, received  
42 implanted multi-contact nerve cuff electrodes and associated components, and performed  
43 the study procedures (LLA01-03). All LLAs were male, with a mean age of  $62 \pm 7$  years  
44 and a height of  $1.75 \pm 0.08$  meters. None of the LLAs had a medical history of  
45 neuropathy, nor did they experience significant pain in their residual limbs. All LLAs  
46 were regular prosthesis users and wore their clinically-prescribed personal prostheses for  
47 all experiments. Two LLAs wore energy-storage-and-return prostheses, and one wore an  
48 actively powered ankle prosthesis (Ottobock Empower), which was unpowered and  
49 thereby locked at a neutral angle during experiments. The Louis Stokes Cleveland  
50 Veterans Affairs Medical Center Institutional Review Board approved all experimental

1 procedures. Portions of this study involving the SNP were conducted under an  
2 Investigational Device Exemption obtained from the United States Food and Drug  
3 Administration (IDE G110043). All participants gave their written informed consent prior  
4 to any research-related activities, which were designed in accordance with the relevant  
5 human subject protection guidelines and regulations.

### 6 7 ***Sensory Neuroprosthesis (SNP)***

8 The SNP consisted of implanted components, an instrumented prosthesis, and an external  
9 controller. The implanted components included 16-contact composite flat interface nerve  
10 cuff electrodes (C-FINEs), which were connected to percutaneous leads exiting the body  
11 at the anterior mid-thigh (Fig. 1A). Each LLA received three C-FINEs surgically  
12 implanted around the sciatic and/or its main branches (tibial and common peroneal  
13 nerves). The external controller was connected to the implanted C-FINEs via the  
14 percutaneous leads. The delivery of electrical currents to the implanted C-FINEs elicited  
15 tactile plantar sensations perceived as if they originated from and were co-located on the  
16 missing foot. The external controller was placed in a fanny pack carried around each  
17 participant's waist while walking (Fig. 1A).

18  
19 The stimulation was delivered in a series of charge-balanced cathodic-first current pulses  
20 with the pulse amplitude (PA) ranging between 0.8 – 2 mA, and pulse width (PW) of 0 –  
21 255 ms. The inter-pulse interval was always kept at 50 Hz, consistent with prior reports  
22 (13, 18). The selected contacts for each C-FINE and their associated PAs were chosen  
23 based on threshold/mapping experiments described in Charkhkar et al. (2018) (15), which  
24 consisted of compiling the verbal reports from the participants describing the location and  
25 modality of the elicited sensations, numerically rating perceived intensities, and repeatedly  
26 capturing the size and referred positions of the percepts referred to the missing or residual  
27 limbs by drawing on a digital tablet. The C-FINE contacts for SNP were then selected  
28 based on percepts reported in plantar regions of interest (e.g., heel, midfoot, and toes or  
29 metatarsal areas). For the implementation of SNP, the intensity of each elicited percept  
30 was linearly modulated while walking by changing the PW value based on readings from  
31 the insole pressure sensors. The full description of the mapping between the sensor and the  
32 stimulation output was given in Charkhkar et al. (2020) (18) and consisted of completely  
33 unloading the foot for baseline and full body weight on the region of interest (heel,  
34 midfoot, and toe) for maximal values to calibrate the interactive system.

35  
36 Each user's personal prosthesis was instrumented by adding a thin film force-sensing  
37 insole (IEE S.A., Bissen, Luxemburg) which was powered by a custom-made circuit board  
38 housed in a lightweight 3D printed enclosure attached to the pylon. The circuit board (i.e.,  
39 the wireless sensor module) also transmitted the force data from each of the eight sensors  
40 embedded in the insole to the external controller. The external controller was programmed  
41 to deliver electrical stimulation within a safe range based on received force data from the  
42 instrumented prosthesis. The perceived intensity and location of the elicited sensation  
43 were adjusted by modulating the stimulation pulse width and the C-FINE contact,  
44 respectively. The details of surgical procedures, implantation techniques, neural interface  
45 technology, sensory characterization, and SNP setup have been reported in our previous  
46 work (15, 18).

### 47 48 ***Experimental Setup and Data Collection***

49 A split-belt instrumented treadmill (R-Mill, ForceLink, The Netherlands) placed in a  
50 virtual reality (VR) facility (V-Gait, Motek Medical, the Netherlands) was used for all

1 walking experiments. Each belt was driven by an independent motor. For simplicity, when  
2 two belts were driven at the same or different speeds, we refer to them as “tied belts” and  
3 “split belts,” respectively. The speed control was achieved via the system D-Flow  
4 software (version 3.16.2, Motek Medical, Amsterdam, the Netherlands). Force data were  
5 recorded from the two force plates embedded in the split-belt treadmill at a 1,000 Hz  
6 sampling frequency. Kinematic data was recorded via a full-body model (Plug-In Gait  
7 Marker Set). The marker trajectories were tracked using a 16-camera motion capture  
8 system (VICON, Oxford, UK) operating at 100 Hz.  
9

### 10 ***Experimental protocols***

11 The first part of the experiment session served as a baseline. During the baseline,  
12 participants walked on tied belts for two minutes, where speed was kept constant at 0.5  
13 m/s. Following the baseline, the experiment session consisted of the following phases:  
14 SJT<sub>pre</sub>, MAT, and SJT<sub>post</sub> (Fig. 5A). The SJT was developed based on previously  
15 established psychophysical approaches to measure perception simultaneity (64). During  
16 SJT, the treadmill belt under the prosthetic side was varied within 0.2 – 0.8 m/s at steps of  
17 0.05 m/s, whereas the other belt was kept at the constant speed of 0.5 m/s the entire time  
18 (Fig. 4A). The 13 different speeds, ranging from 60% slower to 60% faster than the intact  
19 limb belt speed, occurred in a randomized order. Participants were asked to verbally  
20 announce whether they perceived both limbs at the same speed. The speed change  
21 happened every 6-10 seconds, depending on the participant’s response time. The total  
22 number of speed changes within the SJT was 72, which included four repetitions for each  
23 of the 12 split-belt speeds and 24 repetitions of the tied belts. During MAT, participants  
24 experienced a 2:1 (1.0 m/s:0.5 m/s) belt speed perturbation for 10 minutes (Fig. 5A). The  
25 faster belt speed always happened on the prosthetic side. The SJT<sub>post</sub> condition was  
26 identical to SJT<sub>pre</sub> and performed to determine any motor and perceptual changes  
27 following MAT. Although the speeds within the SJT blocks were randomized within each  
28 experiment, the order of speed blocks was kept the same between SJT<sub>pre</sub> and SJT<sub>post</sub> for  
29 each session to determine the aftereffects of MAT in both motor and perceptual domains.  
30 Due to the availability of participants, LLA01, LLA02, and LLA03 performed eight, six,  
31 and four experimental sessions, respectively. The experiments with LLAs lasted  
32 approximately five months, during which time SNP consistently elicited stable percepts  
33 with no change in reported locations, modalities, and intensities over time. The starting  
34 order of the SNP condition was randomized between participants, and they each  
35 performed equal sessions with the SNP active and inactive. ABs performed a single  
36 session only.  
37

38 In all experiments, participants were positioned in the middle of the treadmill with one leg  
39 on each belt and wore a safety harness suspended from the ceiling (Fig. 4A). The safety  
40 harness did not support body weight and did not restrict their walking. Participants were  
41 blind to the timing and order of the belt speed changes. They were instructed not to hold  
42 onto the handrails on the side of the treadmill while walking unless they felt unbalanced.  
43 They wore dribble goggles to refrain from looking down at the belts or their feet and were  
44 instructed to look straight at the VR screen in front of the treadmill. Any auditory cues due  
45 to treadmill motors were canceled via noise-cancellation headphones (Sony WF-1000X,  
46 New York, NY, USA) playing white noise.  
47

### 48 ***Data analysis and outcome measures***

49 Marker trajectories were labeled, and gaps were filled using Vicon Nexus 1.8.5 (Oxford  
50 Metrics). We filtered marker and force data with a zero-phase lag fourth-order

1 Butterworth low-pass filter with a 5-9 Hz cut-off frequency selected by a residual analysis  
2 (65). A subject-specific, 15-segment rigid body model, including head, forearms, upper  
3 arms, hands, trunk, pelvis, thighs, shanks, and feet, was created in Visual3D (C-Motion,  
4 Inc, Germantown, MD). The body segment parameters (mass, COM, and radius of  
5 gyration ratios) reported by De Leva (1996) were used to find the location and velocity of  
6 the whole-body COM (66). The single force-plate center-of-pressure (COP) was obtained  
7 by scaling the COP position of each force plate with the magnitude of its respective GRF.  
8 The COP represents a weighted average of the pressures of the feet area in contact with  
9 the ground. Processed kinematic and kinetic data were exported as ASCII files and then  
10 imported into MATLAB to compute outcome measures.

11  
12 We first measured two spatiotemporal gait parameters: step length (SL, the absolute  
13 difference in anteroposterior distance between the heel marker of each limb at the heel  
14 strike over a gait cycle) and stance time (ST, the time that the foot is on the ground  
15 between a heel-strike to the following toe-off of the same foot). We then calculated SL  
16 and ST symmetries as the percentage of the prosthetic to the intact SL and ST,  
17 respectively. To examine the effect of plantar sensation on limb loading response, we  
18 analyzed the GRF peaks and impulses at each limb, normalized by body weight (N). The  
19 GRF symmetry was defined as the percentage of the ratio of the prosthetic to the intact  
20 limb's forces. The dynamic gait stability of LLAs was examined by analyzing the whole-  
21 body angular momentum (WBAM) about the body's COM normalized by body mass (kg),  
22 height (m), and walking speed (m/s) (42). The peak-to-peak range of WBAM in the  
23 sagittal and frontal planes of motion was subsequently calculated and reported (6, 67).  
24 Furthermore, we analyzed the mediolateral distance between the COP and COM (i.e.,  
25 external moment arm of the GRF in the frontal plane) to quantify the time rate of change  
26 in the frontal-plane WBAM. (68). We measured the peak angles at the ankle, knee, and  
27 hip joints in the sagittal plane over the gait cycle to determine any changes in joint  
28 kinematics due to the SNP

29  
30 We calculated the perception symmetry as a function of belt speed differences by fitting  
31 each participant's 'symmetric' responses to a psychometric curve (i.e., Gaussian curve  
32 limited to 100%) during SJTs. Only psychometric curves with goodness of fit ( $R^2$ ) values  
33 above 0.5 were accepted for statistical analysis (64). A single measure was extracted from  
34 the psychometric curve: the perceived symmetry at a 1:1 belt speed ratio (i.e., zero  
35 difference between belt speeds). This represents the percentage of true positives when  
36 participants correctly responded "Symmetry" when the belt speeds were actually the same.  
37 In all symmetry measures across experiments, a value of 100 indicated perfect symmetry.  
38 The symmetry value over 100 indicated a greater perceived speed on the prosthetic side  
39 than on the intact side and vice versa.

40  
41 To corroborate the limb movement perception results with a comprehensive  
42 biomechanical measure during SJTs and MAT, we calculated the forward COMV at the  
43 moment the vertical COMV was zero during the stance period on each limb (Fig. 4D). The  
44 symmetry of the COMV was computed as the percentage of the ratio of the forward  
45 COMV during the prosthetic stance phase to the one during the intact stance phase (46).  
46 COMV symmetry was previously utilized to account for the normalized speed difference  
47 performed by each limb on the body's COM in individuals with lower limb loss and  
48 exhibited robust performance and consistency in the inverted pendulum model for  
49 amputee gait (69).

50

## 1 *Statistical analysis*

2 All data were exported and processed in MATLAB (R2021b, MathWorks, Natick, MA,  
3 USA) and reported as mean values  $\pm$  SD. The normality of data distributions was verified  
4 using the Kolmogorov-Smirnov normality test. For the baseline, SJT<sub>pre</sub>, and MAT, a  
5 paired samples t-test was used to compare the outcome measures between SNP conditions  
6 (i.e., active or inactive). To determine the effects of SNP on motor adaptation, a two-way  
7 repeated measures ANOVA was conducted to compare the outcome measures for each  
8 SNP condition and task (i.e., SJT<sub>pre</sub>, MAT, and SJT<sub>post</sub>). Pair-wise post-hoc comparisons  
9 were performed using a Bonferroni adjustment. Significance was set at  $\alpha < 0.05$ .

## 10 **Supplementary Materials**

11 Table S1

12 Figs. S1 to S10

## 14 **References and Notes**

- 15 1. J. Kulkarni, S. Wright, C. Toole, J. Morris, R. Hiron, Falls in patients with lower limb  
16 amputations: prevalence and contributing factors. *Physiotherapy* **2**, 130–136 (1996).
- 17 2. W. C. Miller, M. Speechley, A. B. Deathe, Balance confidence among people with  
18 lower-limb amputations. *Physical therapy* **82**, 856–865 (2002).
- 19 3. C. R. Claret, G. W. Herget, L. Kouba, D. Wiest, J. Adler, V. von Tscharnar, T. Stieglitz,  
20 C. Pasluosta, Neuromuscular adaptations and sensorimotor integration following a  
21 unilateral transfemoral amputation. *Journal of neuroengineering and rehabilitation* **16**, 1–  
22 11 (2019).
- 23 4. L. Nolan, A. Wit, K. Dudziński, A. Lees, M. Lake, M. Wychowański, Adjustments in  
24 gait symmetry with walking speed in trans-femoral and trans-tibial amputees. *Gait &*  
25 *posture* **17**, 142–151 (2003).
- 26 5. R. S. Gailey, M. A. Wenger, M. Raya, N. Kirk, K. Erbs, P. Spyropoulos, M. S. Nash,  
27 Energy expenditure of trans-tibial amputees during ambulation at self-selected pace.  
28 *Prosthetics and orthotics international* **18**, 84–91 (1994).
- 29 6. A. K. Silverman, R. R. Neptune, Differences in whole-body angular momentum  
30 between below-knee amputees and non-amputees across walking speeds. *Journal of*  
31 *biomechanics* **44**, 379–385 (2011).
- 32 7. F. M. Petrini, M. Bumbasirevic, G. Valle, V. Ilic, P. Mijović, P. Čvančara, F. Barberi,  
33 N. Katic, D. Bortolotti, D. Andreu, Sensory feedback restoration in leg amputees improves  
34 walking speed, metabolic cost and phantom pain. *Nature medicine* **25**, 1356–1363 (2019).
- 35 8. S. Rossignol, R. Dubuc, J.-P. Gossard, Dynamic sensorimotor interactions in  
36 locomotion. *Physiological reviews* **86**, 89–154 (2006).
- 37 9. M. Alfuth, D. Rosenbaum, Effects of changes in plantar sensory feedback on human  
38 gait characteristics: a systematic review. *Footwear Science* **4**, 1–22 (2012).
- 39 10. G. A. Metz, I. Q. Whishaw, Cortical and subcortical lesions impair skilled walking in  
40 the ladder rung walking test: a new task to evaluate fore-and hindlimb stepping, placing,  
41 and co-ordination. *Journal of neuroscience methods* **115**, 169–179 (2002).
- 42 11. L. J. Bouyer, S. Rossignol, Contribution of cutaneous inputs from the hindpaw to the  
43 control of locomotion. II. Spinal cats. *Journal of neurophysiology* **90**, 3640–3653 (2003).
- 44 12. Y. Higurashi, E. Hirasaki, H. Kumakura, Gaits of Japanese macaques (*Macaca*  
45 *fuscata*) on a horizontal ladder and arboreal stability. *American Journal of Physical*  
46 *Anthropology: The Official Publication of the American Association of Physical*  
47 *Anthropologists* **138**, 448–457 (2009).

- 1 13. B. P. Christie, H. Charkhkar, C. E. Shell, C. J. Burant, D. J. Tyler, R. J. Triolo,  
2 Ambulatory searching task reveals importance of somatosensation for lower-limb  
3 amputees. *Scientific reports* **10**, 1–11 (2020).
- 4 14. B. P. Christie, H. Charkhkar, C. E. Shell, P. D. Marasco, D. J. Tyler, R. J. Triolo,  
5 Visual inputs and postural manipulations affect the location of somatosensory percepts  
6 elicited by electrical stimulation. *Scientific reports* **9**, 1–14 (2019).
- 7 15. H. Charkhkar, C. E. Shell, P. D. Marasco, G. J. Pinault, D. J. Tyler, R. J. Triolo, High-  
8 density peripheral nerve cuffs restore natural sensation to individuals with lower-limb  
9 amputations. *Journal of Neural Engineering* **15**, 056002 (2018).
- 10 16. T. R. Clites, M. J. Carty, J. B. Ullauri, M. E. Carney, L. M. Mooney, J.-F. Duval, S. S.  
11 Srinivasan, H. M. Herr, Proprioception from a neurally controlled lower-extremity  
12 prosthesis. *Science Translational Medicine* **10**, eaap8373 (2018).
- 13 17. F. M. Petrini, G. Valle, M. Bumbasirevic, F. Barberi, D. Bortolotti, P. Cvancara, A.  
14 Haiarrassary, P. Mijovic, A. Ö. Sverrisson, A. Pedrocchi, Enhancing functional abilities  
15 and cognitive integration of the lower limb prosthesis. *Science translational medicine* **11**,  
16 eaav8939 (2019).
- 17 18. H. Charkhkar, B. P. Christie, R. J. Triolo, Sensory neuroprosthesis improves postural  
18 stability during Sensory Organization Test in lower-limb amputees. *Scientific reports* **10**,  
19 1–13 (2020).
- 20 19. G. Preatoni, G. Valle, F. M. Petrini, S. Raspopovic, Lightening the perceived  
21 prosthesis weight with neural embodiment promoted by sensory feedback. *Current*  
22 *Biology* **31**, 1065–1071 (2021).
- 23 20. C. Dietrich, S. Nehrdich, S. Seifert, K. R. Blume, W. H. Miltner, G. O. Hofmann, T.  
24 Weiss, Leg prosthesis with somatosensory feedback reduces phantom limb pain and  
25 increases functionality. *Frontiers in neurology* **9**, 270 (2018).
- 26 21. E. D’anna, F. M. Petrini, F. Artoni, I. Popovic, I. Simanić, S. Raspopovic, S. Micera,  
27 A somatotopic bidirectional hand prosthesis with transcutaneous electrical nerve  
28 stimulation based sensory feedback. *Scientific reports* **7**, 1–15 (2017).
- 29 22. M. W. Mathis, A. Mathis, N. Uchida, Somatosensory cortex plays an essential role in  
30 forelimb motor adaptation in mice. *Neuron* **93**, 1493–1503 (2017).
- 31 23. H. I. Krebs, T. Brashers-Krug, S. L. Rauch, C. R. Savage, N. Hogan, R. H. Rubin, A.  
32 J. Fischman, N. M. Alpert, Robot-aided functional imaging: Application to a motor  
33 learning study. *Human brain mapping* **6**, 59–72 (1998).
- 34 24. C. Pavlides, E. Miyashita, H. Asanuma, Projection from the sensory to the motor  
35 cortex is important in learning motor skills in the monkey. *Journal of neurophysiology* **70**,  
36 733–741 (1993).
- 37 25. E. D. Vidoni, N. E. Acerra, E. Dao, S. K. Meehan, L. A. Boyd, Role of the primary  
38 somatosensory cortex in motor learning: An rTMS study. *Neurobiology of learning and*  
39 *memory* **93**, 532–539 (2010).
- 40 26. J. G. Penn-Barwell, Outcomes in lower limb amputation following trauma: a  
41 systematic review and meta-analysis. *Injury* **42**, 1474–1479 (2011).
- 42 27. M. Cai, Y. Xie, B. Bowe, A. K. Gibson, M. A. Zayed, T. Li, Z. Al-Aly, Temporal  
43 trends in incidence rates of lower extremity amputation and associated risk factors among  
44 patients using Veterans Health Administration services from 2008 to 2018. *JAMA network*  
45 *open* **4**, e2033953–e2033953 (2021).
- 46 28. D. S. Reisman, H. J. Block, A. J. Bastian, Interlimb coordination during locomotion:  
47 what can be adapted and stored? *Journal of neurophysiology* **94**, 2403–2415 (2005).
- 48 29. E. K. Cressman, D. Y. Henriques, Sensory recalibration of hand position following  
49 visuomotor adaptation. *Journal of neurophysiology* **102**, 3505–3518 (2009).

- 1 30. L. Jensen, T. Prokop, V. Dietz, Adaptational effects during human split-belt walking:  
2 influence of afferent input. *Experimental brain research* **118**, 126–130 (1998).
- 3 31. A. Vazquez, M. A. Statton, S. A. Busgang, A. J. Bastian, Split-belt walking adaptation  
4 recalibrates sensorimotor estimates of leg speed but not position or force. *Journal of*  
5 *neurophysiology* **114**, 3255–3267 (2015).
- 6 32. S. H. Collins, A. D. Kuo, Recycling energy to restore impaired ankle function during  
7 human walking. *PLoS one* **5**, e9307 (2010).
- 8 33. A. D. Segal, K. E. Zelik, G. K. Klute, D. C. Morgenroth, M. E. Hahn, M. S. Orendurff,  
9 P. G. Adamczyk, S. H. Collins, A. D. Kuo, J. M. Czerniecki, The effects of a controlled  
10 energy storage and return prototype prosthetic foot on transtibial amputee ambulation.  
11 *Human movement science* **31**, 918–931 (2012).
- 12 34. H. M. Herr, A. M. Grabowski, Bionic ankle–foot prosthesis normalizes walking gait  
13 for persons with leg amputation. *Proceedings of the Royal Society B: Biological Sciences*  
14 **279**, 457–464 (2012).
- 15 35. J. Hitt, T. Sugar, M. Holgate, R. Bellman, K. Hollander, Robotic transtibial prosthesis  
16 with biomechanical energy regeneration. *Industrial Robot: An International Journal* **36**,  
17 441–447 (2009).
- 18 36. M. Kim, S. H. Collins, Once-per-step control of ankle-foot prosthesis push-off work  
19 reduces effort associated with balance during walking. *Journal of neuroengineering and*  
20 *rehabilitation* **12**, 1–13 (2015).
- 21 37. D. A. Winter, Human balance and posture control during standing and walking. *Gait*  
22 *& posture* **3**, 193–214 (1995).
- 23 38. S. M. Bruijn, J. H. Van Dieën, Control of human gait stability through foot placement.  
24 *Journal of The Royal Society Interface* **15**, 20170816 (2018).
- 25 39. D. Kim, C. L. Lewis, A. K. Silverman, S. V. Gill, Changes in dynamic balance control  
26 in adults with obesity across walking speeds. *Journal of biomechanics* , 111308 (2022).
- 27 40. R. R. Neptune, C. P. McGowan, Muscle contributions to frontal plane angular  
28 momentum during walking. *Journal of biomechanics* **49**, 2975–2981 (2016).
- 29 41. H. Elftman, Forces and energy changes in the leg during walking. *American Journal of*  
30 *Physiology-Legacy Content* **125**, 339–356 (1939).
- 31 42. H. Herr, M. Popovic, Angular momentum in human walking. *Journal of experimental*  
32 *biology* **211**, 467–481 (2008).
- 33 43. M. Pijnappels, M. F. Bobbert, J. H. van Dieën, Push-off reactions in recovery after  
34 tripping discriminate young subjects, older non-fallers and older fallers. *Gait & posture*  
35 **21**, 388–394 (2005).
- 36 44. W. C. Miller, A. B. Deathe, M. Speechley, J. Koval, The influence of falling, fear of  
37 falling, and balance confidence on prosthetic mobility and social activity among  
38 individuals with a lower extremity amputation. *Archives of physical medicine and*  
39 *rehabilitation* **82**, 1238–1244 (2001).
- 40 45. H. Goujon-Pillet, E. Sapin, P. Fodé, F. Lavaste, Three-dimensional motions of trunk  
41 and pelvis during transfemoral amputee gait. *Archives of physical medicine and*  
42 *rehabilitation* **89**, 87–94 (2008).
- 43 46. P. G. Adamczyk, A. D. Kuo, Mechanisms of gait asymmetry due to push-off  
44 deficiency in unilateral amputees. *IEEE transactions on neural systems and rehabilitation*  
45 *engineering* **23**, 776–785 (2014).
- 46 47. A. J. Bastian, Understanding sensorimotor adaptation and learning for rehabilitation.  
47 *Current opinion in neurology* **21**, 628 (2008).
- 48 48. A. J. Bastian, Learning to predict the future: the cerebellum adapts feedforward  
49 movement control. *Current opinion in neurobiology* **16**, 645–649 (2006).



- 1 49. S. E. Criscimagna-Hemminger, A. J. Bastian, R. Shadmehr, Size of error affects  
2 cerebellar contributions to motor learning. *Journal of neurophysiology* **103**, 2275–2284  
3 (2010).
- 4 50. D. Y. Henriques, F. Filippopoulos, A. Straube, T. Eggert, The cerebellum is not  
5 necessary for visually driven recalibration of hand proprioception. *Neuropsychologia* **64**,  
6 195–204 (2014).
- 7 51. J. A. Harris, C. Miniussi, I. M. Harris, M. E. Diamond, Transient storage of a tactile  
8 memory trace in primary somatosensory cortex. *Journal of Neuroscience* **22**, 8720–8725  
9 (2002).
- 10 52. D. Zhao, Y.-D. Zhou, M. Bodner, Y. Ku, The causal role of the prefrontal cortex and  
11 somatosensory cortex in tactile working memory. *Cerebral Cortex* **28**, 3468–3477 (2018).
- 12 53. L. E. Osborn, A. Dragomir, J. L. Betthausen, C. L. Hunt, H. H. Nguyen, R. R. Kaliki,  
13 N. V. Thakor, Prosthesis with neuromorphic multilayered e-dermis perceives touch and  
14 pain. *Science robotics* **3**, eaat3818 (2018).
- 15 54. T. M. Hoogland, J. R. De Gruijl, L. Witter, C. B. Canto, C. I. De Zeeuw, Role of  
16 synchronous activation of cerebellar Purkinje cell ensembles in multi-joint movement  
17 control. *Current Biology* **25**, 1157–1165 (2015).
- 18 55. M. F. Vinuesa Veloz, K. Zhou, L. W. Bosman, J.-W. Potters, M. Negrello, R. M.  
19 Seepers, C. Strydis, S. K. Koekkoek, C. I. De Zeeuw, Cerebellar control of gait and  
20 interlimb coordination. *Brain Structure and Function* **220**, 3513–3536 (2015).
- 21 56. G. Valle, A. Saliji, E. Fogle, A. Cimolato, F. M. Petrini, S. Raspopovic, Mechanisms  
22 of neuro-robotic prosthesis operation in leg amputees. *Science Advances* **7**, eabd8354  
23 (2021).
- 24 57. S. A. Gard, Use of quantitative gait analysis for the evaluation of prosthetic walking  
25 performance. *JPO: Journal of Prosthetics and Orthotics* **18**, P93–P104 (2006).
- 26 58. A. H. Hansen, M. R. Meier, P. H. Sessoms, D. S. Childress, The effects of prosthetic  
27 foot roll-over shape arc length on the gait of trans-tibial prosthesis users. *Prosthetics and*  
28 *Orthotics International* **30**, 286–299 (2006).
- 29 59. S. Raspopovic, G. Valle, F. M. Petrini, Sensory feedback for limb prostheses in  
30 amputees. *Nature Materials* **20**, 925–939 (2021).
- 31 60. C. E. Shell, B. P. Christie, P. D. Marasco, H. Charkhkar, R. J. Triolo, Lower-limb  
32 amputees adjust quiet stance in response to manipulations of plantar sensation. *Frontiers*  
33 *in neuroscience* **15**, 611926 (2021).
- 34 61. M. S. Schmitt, J. D. Wright, R. J. Triolo, H. Charkhkar, E. L. Graczyk, The experience  
35 of sensorimotor integration of a lower limb sensory neuroprosthesis: A qualitative case  
36 study. *Frontiers in Human Neuroscience* (2023).
- 37 62. D. W. Tan, M. A. Schiefer, M. W. Keith, J. R. Anderson, D. J. Tyler, Stability and  
38 selectivity of a chronic, multi-contact cuff electrode for sensory stimulation in human  
39 amputees. *Journal of neural engineering* **12**, 026002 (2015).
- 40 63. B. P. Christie, M. Freeberg, W. D. Memberg, G. J. Pinault, H. A. Hoyen, D. J. Tyler,  
41 R. J. Triolo, Long-term stability of stimulating spiral nerve cuff electrodes on human  
42 peripheral nerves. *Journal of neuroengineering and rehabilitation* **14**, 1–12 (2017).
- 43 64. B. P. Christie, E. L. Graczyk, H. Charkhkar, D. J. Tyler, R. J. Triolo, Visuotactile  
44 synchrony of stimulation-induced sensation and natural somatosensation. *Journal of*  
45 *neural engineering* **16**, 036025 (2019).
- 46 65. D. A. Winter, *Biomechanics and motor control of human gait: normal, elderly and*  
47 *pathological* (1991).
- 48 66. P. De Leva, Adjustments to Zatsiorsky-Seluyanov’s segment inertia parameters.  
49 *Journal of biomechanics* **29**, 1223–1230 (1996).

1 67. R. C. Sheehan, E. J. Beltran, J. B. Dingwell, J. M. Wilken, Mediolateral angular  
2 momentum changes in persons with amputation during perturbed walking. *Gait & posture*  
3 **41**, 795–800 (2015).

4 68. D. Kim, C. L. Lewis, S. V. Gill, The effect of obesity on whole-body angular  
5 momentum during steady-state walking. *Gait & Posture* **94**, 93–101 (2022).

6 69. P. G. Adamczyk, A. D. Kuo, Redirection of center-of-mass velocity during the step-to-  
7 step transition of human walking. *Journal of Experimental Biology* **212**, 2668–2678  
8 (2009).

9  
10 **Acknowledgments:** This manuscript has completed the review process in Science Robotics. We  
11 thank all our participants, especially SNP recipients for their dedication and time. We also  
12 thank Melissa Schmitt, RN, Alexandra Hutchison, LPN, Aarika Sheehan, DPT, Clay  
13 Kelly, MD, and Gilles Pinault, MD for their assistance with clinical and regulatory aspects  
14 of this study.

15  
16 **Funding:** This work was supported in part by the Department of Defense under Awards No.  
17 W81XWH-18-1-0321 and W81XWH-20-1-0802. In addition, this material is the result of  
18 work supported with resources and the use of facilities at the Louis Stokes Cleveland VA  
19 Medical Center. Opinions, interpretations, conclusions, and recommendations are those of  
20 the authors and are not necessarily endorsed by the Department of Defense.

21  
22 **Author contributions:** DK and HC conceived the study design and planned the experiments. DK  
23 and HC conducted the experiments and initial discussions of the results and manuscript  
24 content. DK performed the data analysis. DK drafted the manuscript with contributions  
25 from HC and RT. HC and RT supervised the project. All authors contributed to design  
26 development, data interpretation, and manuscript editing.

27  
28 **Competing interests:** The authors declare that the research was conducted in the absence of any  
29 commercial or financial relationships that could be construed as a potential competing  
30 interest.

31  
32 **Data and materials availability:** All data needed to evaluate the conclusions in the paper are  
33 present in the paper or the Supplementary Materials.

34  
35 **Figures:**  
36

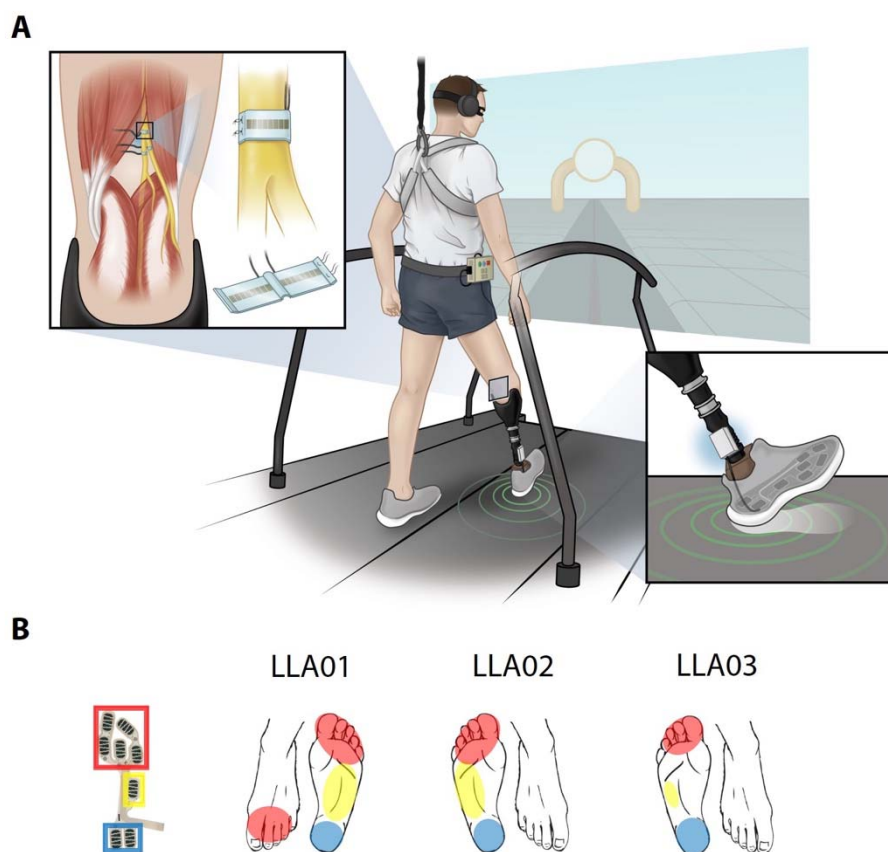

**Fig. 1. Neural interface technology and closed-loop somatosensory neuroprosthesis (SNP).** (A) High-density C-FINEs were implanted around sciatic and/or tibial and peroneal nerves above the knee in three unilateral lower limb amputees (LLAs). The access to individual contacts within each cuff electrode was through percutaneous leads connected to an external stimulator. The SNP provided users with plantar pressure sensations as if they originated in the missing. Elicited sensations corresponded to foot-floor interactions in intensity and location while walking. (B) The perceived locations reported by pressing on the forefoot, midfoot, and rearfoot during walking are shown in red, yellow, and blue, respectively.

1  
2  
3  
4  
5  
6  
7  
8  
9  
10  
11  
12

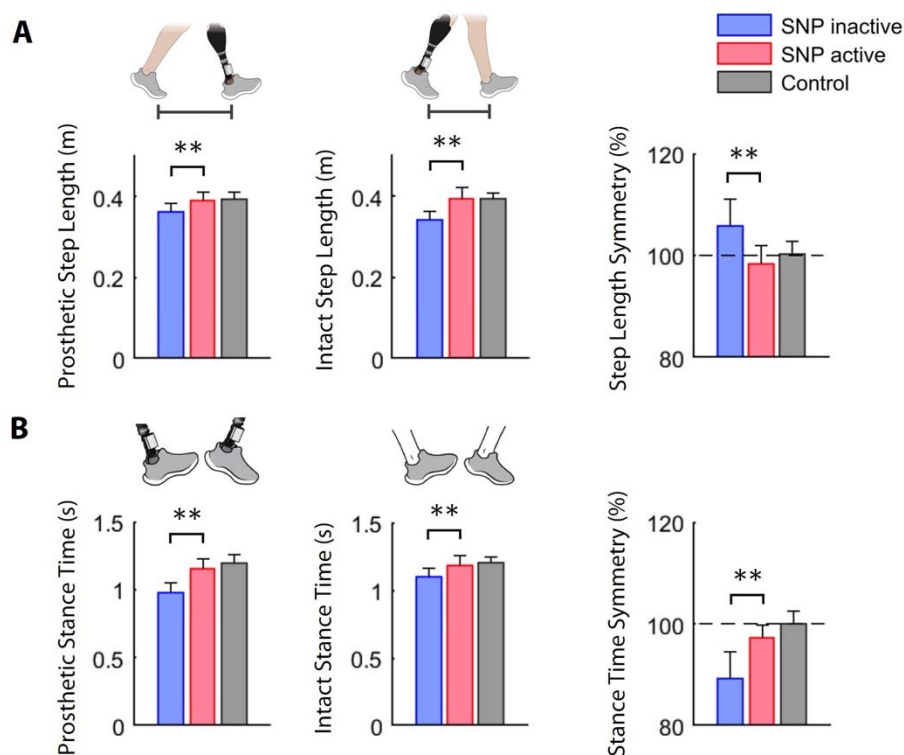

**Fig. 2. Spatiotemporal gait measures. (A)** Step length (SL) from each limb and symmetry between limbs during the steady-state walking at 0.5 m/s. For the symmetry value, 100% indicates perfect symmetry, whereas values above 100 indicate longer prosthetic SL and hence more spatial asymmetry in the gait **(B)** Stance time (ST) from each limb and symmetry between limbs during walking. With a lower symmetry value, the prosthetic ST is shorter than the intact ST, and the gait is temporally more asymmetric. Bar graphs are mean values, and error bars are standard deviations. The asterisks indicate significant differences. \*\* $P < 0.01$ .

1  
2  
3  
4  
5  
6  
7  
8  
9  
10

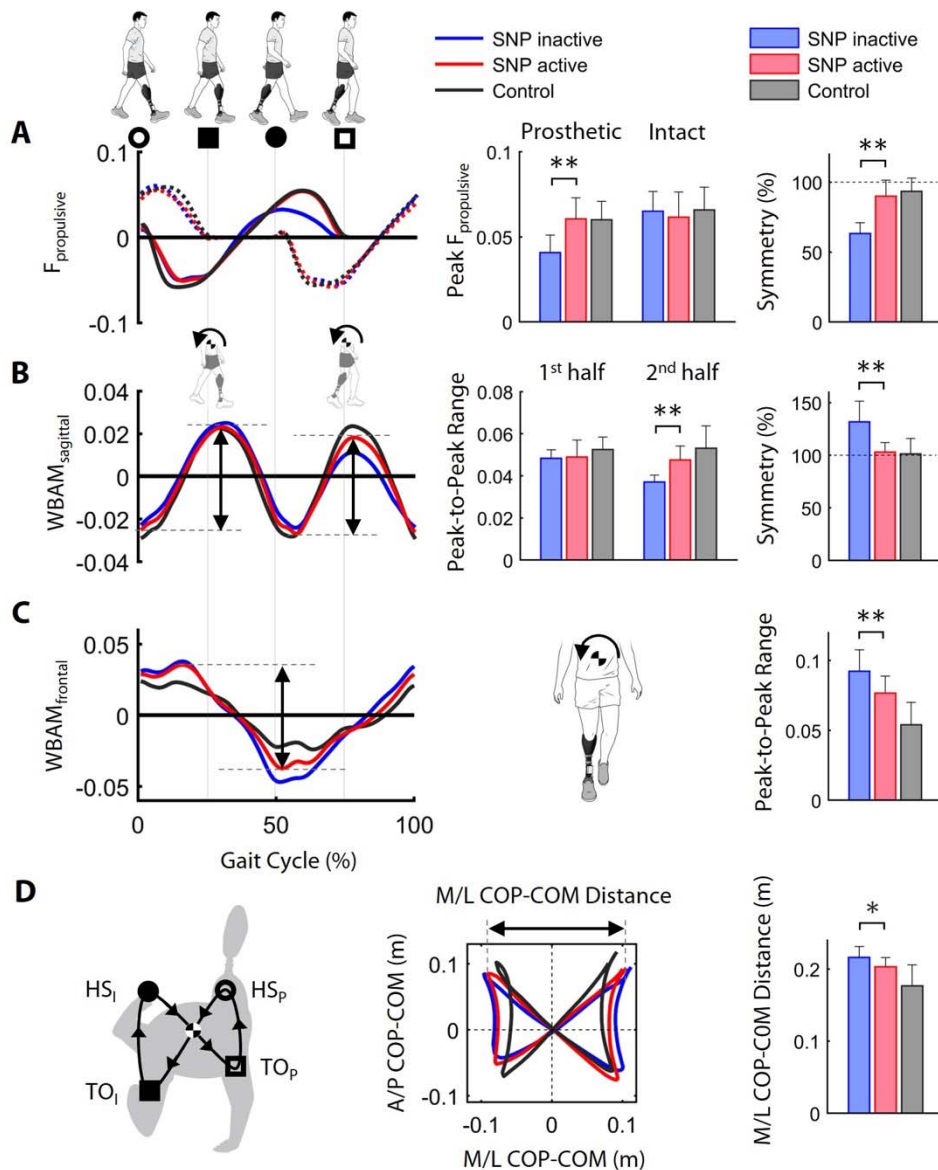

**Fig. 3. Dynamic gait stability measures.** (A) Mean normalized ground reaction force (GRF) in the anterior ( $F_{propulsive}$ ) direction over the prosthetic limb gait cycle while walking at 0.5 m/s. Bar graphs show the peak  $F_{propulsive}$  from each limb and its symmetry between limbs. (B & C) Mean normalized whole-body angular momentum (WBAM) in (B) the sagittal plane ( $WBAM_{sagittal}$ ) and (C) the frontal plane ( $WBAM_{frontal}$ ) over the prosthetic limb gait cycle. In the sagittal plane, the positive WBAM represents a backward rotation of the body, whereas, in the frontal plane, the negative WBAM represents the body rotating toward the prosthetic side. The peak-to-peak range of WBAM is marked with dotted lines and arrows in the line graphs. The bar graphs in (B) show the mean ranges of  $WBAM_{sagittal}$  in the first and second half of the prosthetic limb gait cycle and its symmetry between both halves. The bar graph in (C) shows the mean range of  $WBAM_{frontal}$  over the gait cycle. (D) Butterfly pattern of COP profile relative to the body's COM (i.e., COP-COM distance) measured during walking and the illustration of heel-strike (HS) and toe-off (TO) detection times (represented by circles and squares, respectively) for each limb. Solid and open symbols represent prosthetic and intact limb gait events, respectively. The direction of COP progression during the gait cycle is shown with black arrows. The line plot shows the distances between COP and COM as one series of x-y coordinates. The bar graph shows the mean COP-COM distance in the mediolateral

1 (M/L) direction. The asterisks indicate significant differences.  $**P<0.01$ ;  $*P<0.05$ . HS<sub>P</sub>:  
2 Prosthetic heel strike, TO<sub>I</sub>: Intact toe-off, HS<sub>I</sub>: Intact heel strike, & TO<sub>P</sub>: Prosthetic toe-  
3 off.  
4

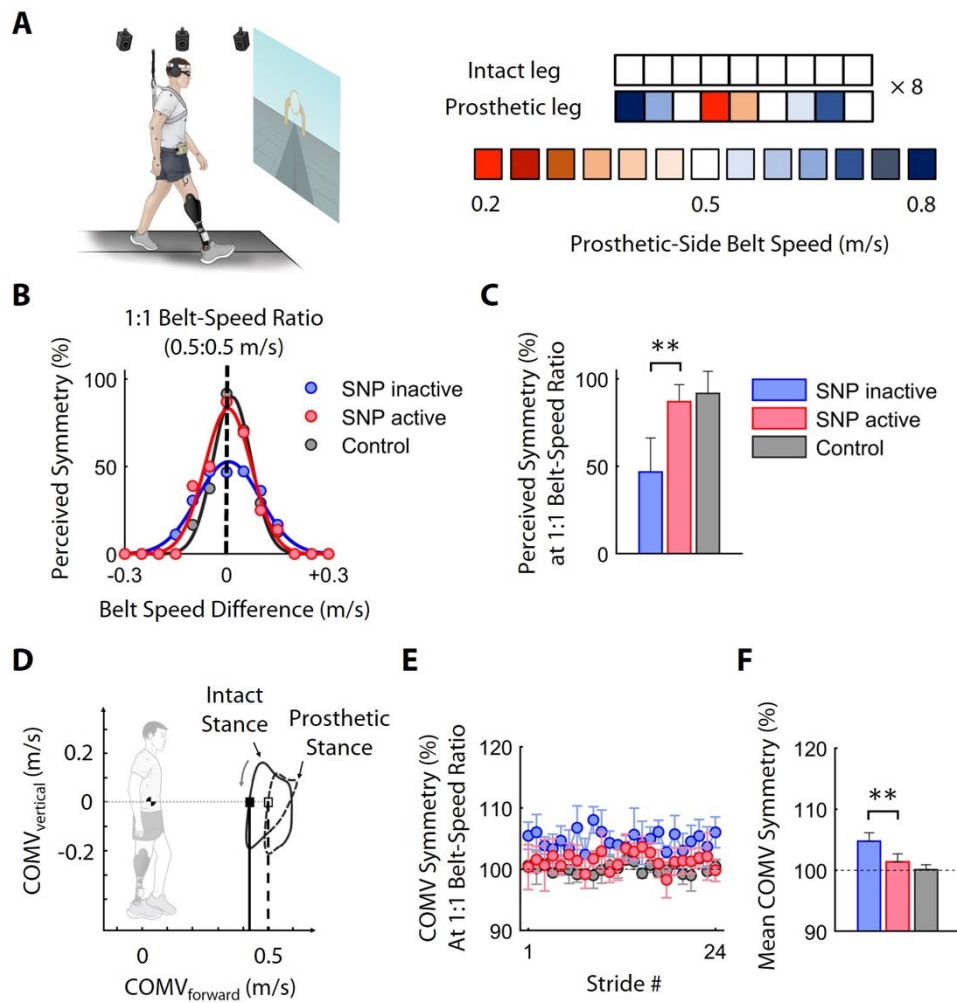

**Fig. 4. Perceived and actual gait symmetry measures.** (A) The symmetry judgment task (SJT). Participants verbally expressed whether they perceived the speed of their prosthetic and intact limbs to be the same. The speed for the prosthetic-side belt was changed between 0.2 to 0.8 m/s at steps of 0.05 m/s (total of 13 levels) in a randomized order, while the intact-side belt was kept at 0.5 m/s. Participants wore dribble goggles to restrict their downward vision. Auditory cues from the treadmill motors were canceled via noise-cancellation headphones playing white noise. Participants wore safety harnesses on their chests, suspended from the ceiling at a non-weight-supporting level. (B) The mean perceived symmetry responses across all speeds. The x-axis shows speed differences from the base speed at 0.5 m/s. The black vertical dotted line indicates when belt speeds were the same. Gaussian curve fitting was used to define symmetry curves. (C) Percentage of perceived symmetry responses when belt speeds were the same. (D) The hodograph shows the COMV trace in vertical versus forward directions during a gait cycle. The trace moves in a counterclockwise path. For LLAs, when the vertical COMV is zero during the stance phase, the forward COMV on the intact side is lower than on the prosthetic side. (E) The COMV symmetry over 24 strides in which the belts had the same speed. (F) Mean COMV symmetry during SJT. In all plots error bars are the standard deviation. The asterisks indicate significant differences.  $**P<0.01$ .

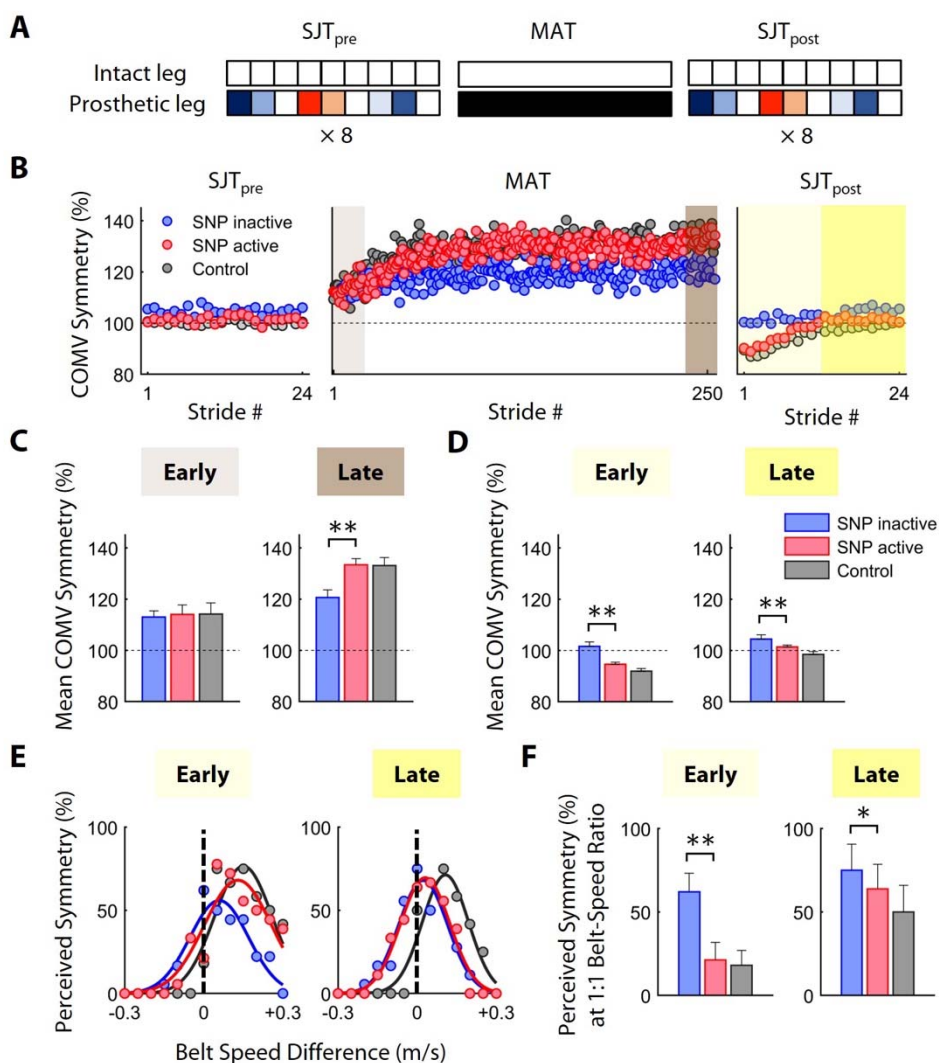

**Fig. 5. Motor and perceptual adaptation and aftereffects.** (A) The motor adaptation task (MAT) was preceded and followed by SJT<sub>pre</sub> and SJT<sub>post</sub>. During MAT, participants experienced a split-belt walking condition at a 2:1 belt-speed ratio (i.e., 1.0 m/s for the prosthetic side and 0.5 m/s for the intact side) for 10 minutes. The procedures for SJT<sub>pre</sub> and SJT<sub>post</sub> were identical to the SJT described in Figure 4. (B) Mean COMV symmetry over strides during SJT<sub>pre</sub>, MAT, and SJT<sub>post</sub>. For SJT<sub>pre</sub> and SJT<sub>post</sub>, data are from strides when belt speeds were the same. (C) Mean adaptation in the COMV symmetry during the early MAT (i.e., first 20 strides, light brown) and the late MAT (i.e., last 20 strides, brown). (D) Mean aftereffects in the COMV symmetry during the early SJT<sub>post</sub> (i.e., first 12 trials, light yellow) and the late SJT<sub>post</sub> (i.e., the last 12 trials, yellow). (E) Mean aftereffects in the perceived symmetry across 13 belt-speed differences in the early SJT<sub>post</sub> (i.e., first 36 trials, light yellow) and the late SJT<sub>post</sub> (i.e., the last 36 trials, yellow). The black vertical dotted lines indicate when belt speeds were the same. (F) Mean aftereffects in the perceived symmetry at a 1:1 belt-speed ratio (i.e., zero belt-speed difference) in the early SJT<sub>post</sub> (i.e., first 12 trials, light yellow) and the late SJT<sub>post</sub> (i.e., the last 12 trials, yellow). In all bar graphs, error bars are the standard deviation. The asterisks indicate a significant difference. \*\* $P < 0.01$ ; \* $P < 0.05$ .



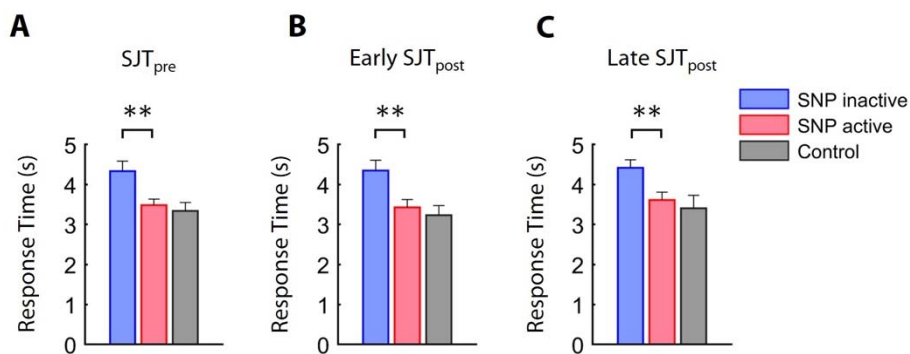

1  
2  
3 **Fig. 6. Response time during SJT.** Given the same belt speed, the time the participants  
4 took to respond whether they perceived the belt speeds the same during (A) SJT<sub>pre</sub>, (B)  
5 early SJT<sub>post</sub>, and (C) late SJT<sub>post</sub>. Mean differences in response time are shown during  
6 SJT<sub>pre</sub> (24 trials), early SJT<sub>post</sub> (i.e., first 12 trials), and late SJT<sub>post</sub> (i.e., the last 12 trials),  
7 respectively. Error bars are the standard deviation. The asterisks indicate a significant  
8 difference. \*\* $P < 0.01$ .  
9
